# The American Psychiatric Association Publishing Textbook of Schizophrenia, Second Edition

Edited by Jeffrey A. Lieberman, M.D., T. Scott Stroup, M.D., M.P.H.,  
Diana O. Perkins, M.D., M.P.H., and Lisa B. Dixon, M.D., M.P.H.

**S**chizophrenia is one of the leading causes of disability worldwide and remains among the most challenging and disheartening disorders confronting psychiatrists and other mental health care providers because of its profound effects on patient functioning, its onset just as young adults are launching their lives, and the limitations of current pharmacological treatments.

Designed to bring the reader up to date on the latest research, this new edition represents a complete overhaul of the previous text, with a new structure, new chapters, and new contributors.

Subjects such as genetics and neurobiology, distinguished by rapid advancements in knowledge, are explored in depth, as are new models of service delivery and psychosocial treatments that are making a significant difference in patients' lives. Foundational information on the epidemiology, etiology, and psychopathology of the illness is presented clearly and cogently, emphasizing research conducted over the last decade. Theories regarding the pathophysiological basis of the disorder, including genetic, molecular, and neurocircuitry models, are examined in detail.

Other noteworthy topics include

- Cultural variations, examining how culture influences the presentation of schizophrenia from the perspective of the experts in cultural psychiatry who developed the DSM-5 Cultural Formulation Interview
- Service delivery models, including assertive community treatment, critical time intervention, coordinated specialty care for early psychosis, and integrated dual diagnosis
- Advances in the existing pharmacological treatments, including use of adjunctive medications and combinations of antipsychotics, which, in the absence of new drug therapies, is indispensable knowledge
- A review of the promising field of neuromodulation
- Evaluation and treatment of comorbidities
- Individual- and family-centered care, which presents the rationale and evidence for actively involving patients and family members in interventions and decision-making about treatments

Designed for ease of use, *The American Psychiatric Association Publishing Textbook of Schizophrenia* furnishes evidence-based and cutting-edge knowledge for the next generation of students, trainees, and clinicians.

2020 • 336 pages • ISBN 978-1-61537-172-3 • Hardcover • \$140.00 • Item #37172

2020 • 336 pages • ISBN 978-1-61537-291-1 • eBook • \$112.00 • Item #37291

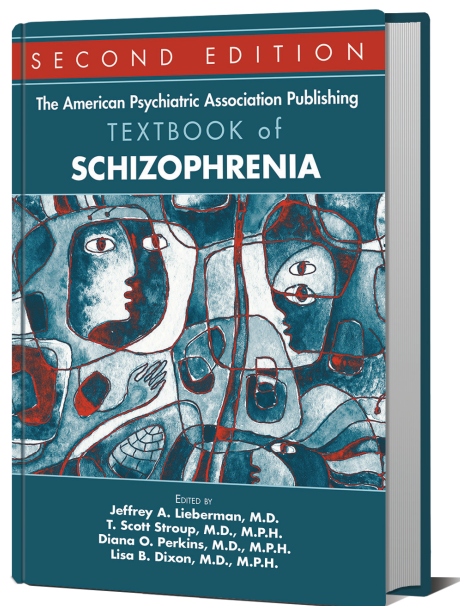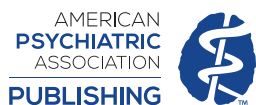

 **20% Discount for American Psychiatric Association Members**  
**25% Discount for APA Resident-Fellow Members**

**ORDER @ [www.appi.org](http://www.appi.org) | Email: [appi@psych.org](mailto:appi@psych.org) | Toll Free: 1-800-368-5777**
