# The Journal of Neuropsychiatry

## and Clinical Neurosciences

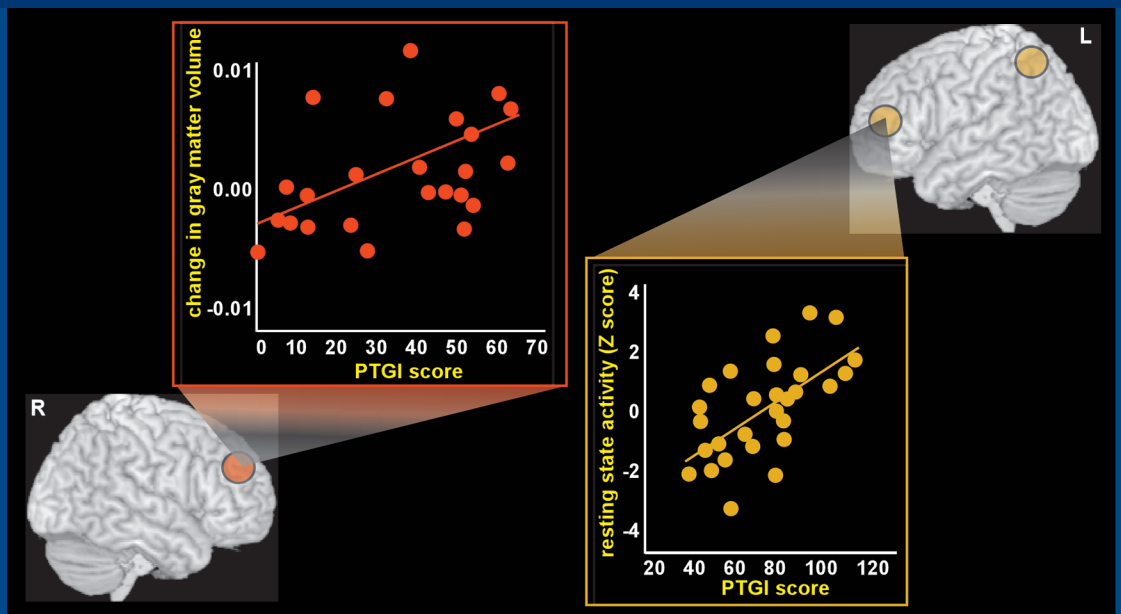

Validation of the Delirium Diagnostic Tool-Provisional (DDT-Pro)  
With Medical Inpatients and Comparison With the  
Confusion Assessment Method Algorithm

Alcohol Use, Mental Health, and Functional Capacity as Predictors of  
Workplace Disability in a Cohort With Manifest Huntington's Disease

Patient Attribution of Posttraumatic Symptoms to Brain  
Injury Versus PTSD in Military-Related Mild TBI

The Phenomenology of Acute Anosognosia for Hemiplegia

Baseline Cognitive Performance and Treatment Outcomes From  
Cognitive-Behavioral Therapies for Posttraumatic  
Stress Disorder: A Naturalistic Study
